# Supplementary material for: Skill and Inter-Model Comparison of Regional and Global Climate Models in Simulating Wind Speed over South Asian Domain
Source: MDPI journal article supplement (doi:10.3390/cli10060085), 2022-06-16
Supplement: s1 [file s1]

## Supplementary Materials:

Naresh K.G. Lakku \* and Manasa R. Behera

**Table S1.** The Relative Score (RS) of each climate model (in descending order) in representing the frequency distribution of daily mean near-surface wind speed over the South Asian Ocean and Land (Note: Here RS is out of 1, which is the summation of historical time slice RS and present time slice RS).

| South Asian Ocean |                             |        | South Asian Land |                                     |        |
|-------------------|-----------------------------|--------|------------------|-------------------------------------|--------|
| Model ID          | Model Acronym               | RS     | Model ID         | Model Acronym                       | RS     |
| 14                | GFDL-ESM2M                  | 1      | 10_RegCM         | CSIRO-QCCCE-CSIRO-Mk3-6-0(RegCM4-4) | 0.9999 |
| 15                | HadGEM2-AO                  | 0.9785 | 10_RCA           | CSIRO-QCCCE-CSIRO-Mk3-6-0(RCA4)     | 0.9923 |
| 19                | IPSL-CM5A-LR                | 0.9760 | 14_RegCM         | NOAA-GFDL-GFDL-ESM2M(RegCM4-4)      | 0.9742 |
| 26                | MPI-ESM-LR                  | 0.9680 | 26_REMO          | MPI-M-MPI-ESM-LR(REMO2009)          | 0.9697 |
| 20                | IPSL-CM5A-MR                | 0.9669 | 23               | MIROC5                              | 0.9686 |
| 27                | MPI-ESM-MR                  | 0.9600 | 6_RegCM          | CCCma-CanESM2(RegCM4-4)             | 0.9676 |
| 9                 | CNRM-CM5                    | 0.9585 | 19_RegCM         | IPSL-IPSL-CM5A-LR(RegCM4-4)         | 0.9580 |
| 26_REMO           | MPI-M-MPI-ESM-LR(REMO2009)  | 0.9585 | 27_RegCM         | MPI-M-MPI-ESM-MR(RegCM4-4)          | 0.9549 |
| 18                | INM-CM4                     | 0.9519 | 17_RCA           | MOHC-HadGEM2-ES(RCA4)               | 0.9530 |
| 21                | IPSL-CM5B-LR                | 0.9429 | 26               | MPI-ESM-LR                          | 0.9479 |
| 14_RCA            | NOAA-GFDL-GFDL-ESM2M(RCA4)  | 0.9392 | 25               | MIROC-ESM-CHEM                      | 0.9375 |
| 26_RCA            | MPI-M-MPI-ESM-LR(RCA4)      | 0.9370 | 9_RegCM          | CNRM-CERFACS-CNRM-CM5(RegCM4-4)     | 0.9358 |
| 12                | GFDL-CM3                    | 0.9363 | 27               | MPI-ESM-MR                          | 0.9278 |
| 16                | HadGEM2-CC                  | 0.9318 | 23_RCA           | MIROC-MI-ROC5(RCA4)                 | 0.9212 |
| 9_RCA             | CNRM-CERFACS-CNRM-CM5(RCA4) | 0.9313 | 7                | CMCC-CM                             | 0.9189 |
| 17                | HadGEM2-ES                  | 0.9265 | 6                | CanESM2                             | 0.9149 |

Continued...

...Table S1 continued

|              |                                             |        |            |                                      |        |
|--------------|---------------------------------------------|--------|------------|--------------------------------------|--------|
| 7            | CMCC-CM                                     | 0.9194 | 14_R<br>CA | c NOAA-GFDL-<br>GFDL-<br>ESM2M(RCA4) | 0.9143 |
| 13           | GFDL-ESM2G                                  | 0.9175 | 26_R<br>CA | MPI-M-MPI-ESM-<br>LR(RCA4)           | 0.9121 |
| 17_RCA       | MOHC-<br>HadGEM2-<br>ES(RCA4)               | 0.9172 | 22         | MIROC4h                              | 0.9113 |
| 23_RCA       | MIROC-MI-<br>ROC5(RCA4)                     | 0.9137 | 6_RC<br>A  | CCCma-<br>CanESM2(RCA4)              | 0.9103 |
| 6_RCA        | CCCma-<br>CanESM2(RCA4)                     | 0.9033 | 31_R<br>CA | NCC-NorESM1-<br>M(RCA4)              | 0.9076 |
| 5            | CanCM4                                      | 0.9011 | 24         | MIROC-ESM                            | 0.9060 |
| 22           | MIROC4h                                     | 0.8973 | 12         | GFDL-CM3                             | 0.9049 |
| 31_RCA       | NCC-NorESM1-<br>M(RCA4)                     | 0.8870 | 17         | HadGEM2-ES                           | 0.8908 |
| 10_RCA       | CSIRO-QCCCE-<br>CSIRO-Mk3-6-<br>0(RCA4)     | 0.8856 | 2          | ACCESS1.3                            | 0.8895 |
| 8            | CMCC-CMS                                    | 0.8855 | 8          | CMCC-CMS                             | 0.8880 |
| 10_RegC<br>M | CSIRO-QCCCE-<br>CSIRO-Mk3-6-<br>0(RegCM4-4) | 0.8853 | 20         | IPSL-CM5A-MR                         | 0.8880 |
| 6            | CanESM2                                     | 0.8850 | 1          | ACCESS1.0                            | 0.8838 |
| 2            | ACCESS1.3                                   | 0.8700 | 21         | IPSL-CM5B-LR                         | 0.8825 |
| 20_RCA       | IPSL-IPSL-<br>CM5A-<br>MR(RCA4)             | 0.8645 | 20_R<br>CA | IPSL-IPSL-CM5A-<br>MR(RCA4)          | 0.8821 |
| 1            | ACCESS1.0                                   | 0.8626 | 5          | CanCM4                               | 0.8754 |
| 10           | CSIRO-Mk3.6.0                               | 0.8498 | 15         | HadGEM2-AO                           | 0.8726 |
| 23           | MIROC5                                      | 0.8467 | 9_RC<br>A  | CNRM-CERFACS-<br>CNRM-CM5(RCA4)      | 0.8682 |
| 4            | BNU-ESM                                     | 0.8324 | 18         | INM-CM4                              | 0.8606 |
| 28           | MRI-CGCM3                                   | 0.8286 | 19         | IPSL-CM5A-LR                         | 0.8605 |
| 24           | MIROC-ESM                                   | 0.8178 | 11         | FGOALS-s2                            | 0.8601 |
| 25           | MIROC-ESM-<br>CHEM                          | 0.8099 | 16         | HadGEM2-CC                           | 0.8521 |
| 3            | BCC                                         | 0.8045 | 4          | BNU-ESM                              | 0.8164 |
| 19_RegC<br>M | IPSL-IPSL-<br>CM5A-<br>LR(RegCM4-4)         | 0.7791 | 3          | BCC                                  | 0.7916 |
| 27_RegC<br>M | MPI-M-MPI-<br>ESM-<br>MR(RegCM4-4)          | 0.7355 | 9          | CNRM-CM5                             | 0.7805 |
| 6_RegCM      | CCCma-<br>CanESM2(RegCM<br>4-4)             | 0.7019 | 14         | GFDL-ESM2M                           | 0.7783 |

Continued...

...Table S1 continued

|              |                                            |        |    |               |        |
|--------------|--------------------------------------------|--------|----|---------------|--------|
| 11           | FGOALS-s2                                  | 0.6891 | 13 | GFDL-ESM2G    | 0.7723 |
| 14_RegC<br>M | NOAA-GFDL-<br>GFDL-<br>ESM2M(RegCM4-<br>4) | 0.6851 | 28 | MRI-CGCM3     | 0.7453 |
| 9_RegCM      | CNRM-CER-<br>FACS-CNRM-<br>CM5(RegCM4-4)   | 0.5359 | 10 | CSIRO-Mk3.6.0 | 0.7325 |
| 32           | MME_CORDEX                                 | 0.2350 | 32 | MME_CORDEX    | 0.1998 |
| 29           | MME_CMIP5                                  | 0.0000 | 29 | MME_CMIP5     | 0.0000 |

**Table S2.** The Relative Score (RS) of each climate model (in descending order) in representing spatio-temporal variability of the monthly mean near-surface wind speed over the South Asian Ocean and Land (Note: Here RS is out of 8, which is the summation of climate model RS in representing EOF1 variance and pattern, and PC1 magnitude and pattern for both study time slices)

| South Asian Ocean |                                         |        | South Asian Land |                                             |        |
|-------------------|-----------------------------------------|--------|------------------|---------------------------------------------|--------|
| Model ID          | Model Acronym                           | RS     | Model ID         | Model Acronym                               | RS     |
| 15                | HadGEM2-AO                              | 6.8729 | 15               | HadGEM2-AO                                  | 6.7945 |
| 29                | MME_CMIP5                               | 6.6269 | 1                | ACCESS1.0                                   | 6.6357 |
| 17                | HadGEM2-ES                              | 6.5302 | 17               | HadGEM2-ES                                  | 6.5389 |
| 27                | MPI-ESM-MR                              | 6.5125 | 22               | MIROC4h                                     | 6.5300 |
| 10                | CSIRO-Mk3.6.0                           | 6.4398 | 10_RegC<br>M     | CSIRO-QCCCE-<br>CSIRO-Mk3-6-<br>0(RegCM4-4) | 6.4845 |
| 7                 | CMCC-CM                                 | 6.2973 | 20               | IPSL-CM5A-MR                                | 6.4577 |
| 16                | HadGEM2-CC                              | 6.0918 | 26_REM<br>O      | MPI-M-MPI-ESM-<br>LR(REMO2009)              | 6.4071 |
| 12                | GFDL-CM3                                | 5.9636 | 23_RCA           | MIROC-MI-<br>ROC5(RCA4)                     | 6.3490 |
| 32                | MME_CORDEX                              | 5.9346 | 26_RCA           | MPI-M-MPI-ESM-<br>LR(RCA4)                  | 6.2951 |
| 10_RCA            | CSIRO-QCCCE-<br>CSIRO-Mk3-6-<br>0(RCA4) | 5.8965 | 16               | HadGEM2-CC                                  | 6.1672 |
| 8                 | CMCC-CMS                                | 5.8123 | 9_RegC<br>M      | CNRM-CER-<br>FACS-CNRM-<br>CM5(RegCM4-4)    | 6.1491 |
| 9                 | CNRM-CM5                                | 5.7588 | 7                | CMCC-CM                                     | 6.0627 |
| 3                 | BCC                                     | 5.7316 | 8                | CMCC-CMS                                    | 6.0279 |
| 20                | IPSL-CM5A-MR                            | 5.6877 | 29               | MME_CMIP5                                   | 5.9776 |
| 1                 | ACCESS1.0                               | 5.6872 | 6_RegC<br>M      | CCCma-<br>CanESM2(RegCM<br>4-4)             | 5.9734 |
| 13                | GFDL-ESM2G                              | 5.5853 | 27_RegC<br>M     | MPI-M-MPI-ESM-<br>MR(RegCM4-4)              | 5.9660 |

Continued...

...Table S2 continued

|          |                                     |        |          |                                 |        |
|----------|-------------------------------------|--------|----------|---------------------------------|--------|
| 17_RCA   | MOHC-HadGEM2-ES(RCA4)               | 5.5081 | 3        | BCC                             | 5.9416 |
| 23       | MIROC5                              | 5.4972 | 23       | MIROC5                          | 5.8655 |
| 26_REMO  | MPI-M-MPI-ESM-LR(REMO2009)          | 5.4283 | 9_RCA    | CNRM-CER-FACS-CNRM-CM5(RCA4)    | 5.8270 |
| 26       | MPI-ESM-LR                          | 5.4091 | 13       | GFDL-ESM2G                      | 5.7378 |
| 6        | CanESM2                             | 5.3886 | 27       | MPI-ESM-MR                      | 5.7009 |
| 22       | MIROC4h                             | 5.2362 | 14       | GFDL-ESM2M                      | 5.6934 |
| 6_RCA    | CCCma-CanESM2(RCA4)                 | 5.2308 | 32       | MME_CORDEX                      | 5.6481 |
| 14       | GFDL-ESM2M                          | 5.1756 | 6        | CanESM2                         | 5.5247 |
| 19       | IPSL-CM5A-LR                        | 5.1378 | 19       | IPSL-CM5A-LR                    | 5.5221 |
| 10_RegCM | CSIRO-QCCCE-CSIRO-Mk3-6-0(RegCM4-4) | 5.0386 | 6_RCA    | CCCma-CanESM2(RCA4)             | 5.4167 |
| 14_RCA   | NOAA-GFDL-GFDL-ESM2M(RCA4)          | 4.4049 | 17_RCA   | MOHC-HadGEM2-ES(RCA4)           | 5.4120 |
| 25       | MIROC-ESM-CHEM                      | 4.3373 | 18       | INM-CM4                         | 5.2778 |
| 18       | INM-CM4                             | 4.2603 | 26       | MPI-ESM-LR                      | 5.1054 |
| 2        | ACCESS1.3                           | 4.1571 | 10       | CSIRO-Mk3.6.0                   | 5.0997 |
| 28       | MRI-CGCM3                           | 4.1161 | 14_RCA   | NOAA-GFDL-GFDL-ESM2M(RCA4)      | 5.0910 |
| 20_RCA   | IPSL-IPSL-CM5A-MR(RCA4)             | 4.0603 | 2        | ACCESS1.3                       | 5.0235 |
| 4        | BNU-ESM                             | 3.9645 | 12       | GFDL-CM3                        | 4.9744 |
| 24       | MIROC-ESM                           | 3.9587 | 20_RCA   | IPSL-IPSL-CM5A-MR(RCA4)         | 4.9691 |
| 5        | CanCM4                              | 3.9076 | 10_RCA   | CSIRO-QCCCE-CSIRO-Mk3-6-0(RCA4) | 4.8798 |
| 26_RCA   | MPI-M-MPI-ESM-LR(RCA4)              | 3.8568 | 14_RegCM | NOAA-GFDL-GFDL-ESM2M(RegCM4-4)  | 4.8475 |
| 9_RCA    | CNRM-CERFACS-CNRM-CM5(RCA4)         | 3.6516 | 11       | FGOALS-s2                       | 4.6573 |
| 23_RCA   | MIROC-MIROC5(RCA4)                  | 3.5940 | 31_RCA   | NCC-NorESM1-M(RCA4)             | 4.6123 |
| 14_RegCM | NOAA-GFDL-GFDL-ESM2M(RegCM4-4)      | 3.2586 | 9        | CNRM-CM5                        | 4.5479 |
| 21       | IPSL-CM5B-LR                        | 3.2175 | 28       | MRI-CGCM3                       | 4.4270 |

Continued...

...Table S2 continued

|              |                                         |        |              |                                 |        |
|--------------|-----------------------------------------|--------|--------------|---------------------------------|--------|
| 11           | FGOALS-s2                               | 2.8217 | 21           | IPSL-CM5B-LR                    | 4.2980 |
| 19_Reg<br>CM | IPSL-IPSL-CM5A-<br>LR(RegCM4-4)         | 2.5595 | 4            | BNU-ESM                         | 3.9604 |
| 9_RegC<br>M  | CNRM-CERFACS-<br>CNRM-<br>CM5(RegCM4-4) | 2.5408 | 19_RegC<br>M | IPSL-IPSL-CM5A-<br>LR(RegCM4-4) | 3.8483 |
| 31_RCA       | NCC-NorESM1-<br>M(RCA4)                 | 2.4622 | 25           | MIROC-ESM-<br>CHEM              | 3.3424 |
| 27_Reg<br>CM | MPI-M-MPI-ESM-<br>MR(RegCM4-4)          | 2.4333 | 5            | CanCM4                          | 2.6336 |
| 6_RegC<br>M  | CCCma-<br>CanESM2(RegCM4<br>-4)         | 2.3125 | 24           | MIROC-ESM                       | 2.4210 |

**Table S3.** The Relative Score (RS) of each climate model (in descending order) in capturing the annual cycle variation over the South Asian Ocean and Land (Note: Here RS is out of 2, which is the summation of historical time slice RS and present time slice RS)

| South Asian Ocean |                                             |        | South Asian Land |                                         |        |
|-------------------|---------------------------------------------|--------|------------------|-----------------------------------------|--------|
| Model ID          | Model Acronym                               | RS     | Model ID         | Model Acronym                           | RS     |
| 26_REM<br>O       | MPI-M-MPI-ESM-<br>LR(REMO2009)              | 2.0000 | 26_REM<br>O      | MPI-M-MPI-ESM-<br>LR(REMO2009)          | 1.9937 |
| 26                | MPI-ESM-LR                                  | 1.8761 | 32               | MME_CORDEX                              | 1.9700 |
| 27                | MPI-ESM-MR                                  | 1.7137 | 29               | MME_CMIP5                               | 1.8126 |
| 32                | MME_CORDEX                                  | 1.6619 | 26_RCA           | MPI-M-MPI-ESM-<br>LR(RCA4)              | 1.7923 |
| 13                | GFDL-ESM2G                                  | 1.6558 | 9                | CNRM-CM5                                | 1.6756 |
| 3                 | BCC                                         | 1.6468 | 10_RCA           | CSIRO-QCCCE-<br>CSIRO-Mk3-6-<br>0(RCA4) | 1.5505 |
| 29                | MME_CMIP5                                   | 1.5870 | 17_RCA           | MOHC-<br>HadGEM2-<br>ES(RCA4)           | 1.5095 |
| 12                | GFDL-CM3                                    | 1.5816 | 9_RCA            | CNRM-CER-<br>FACS-CNRM-<br>CM5(RCA4)    | 1.4459 |
| 10                | CSIRO-Mk3.6.0                               | 1.5430 | 7                | CMCC-CM                                 | 1.4350 |
| 10_RCA            | CSIRO-QCCCE-<br>CSIRO-Mk3-6-<br>0(RCA4)     | 1.5259 | 31_RCA           | NCC-NorESM1-<br>M(RCA4)                 | 1.4141 |
| 4                 | BNU-ESM                                     | 1.4894 | 20_RCA           | IPSL-IPSL-CM5A-<br>MR(RCA4)             | 1.4047 |
| 10_Reg<br>CM      | CSIRO-QCCCE-<br>CSIRO-Mk3-6-<br>0(RegCM4-4) | 1.4781 | 23_RCA           | MIROC-MI-<br>ROC5(RCA4)                 | 1.3938 |

Continued...

...Table S3 continued

|              |                                            |        |              |                                             |        |
|--------------|--------------------------------------------|--------|--------------|---------------------------------------------|--------|
| 23           | MIROC5                                     | 1.4600 | 14_RCA       | NOAA-GFDL-<br>GFDL-<br>ESM2M(RCA4)          | 1.3871 |
| 14           | GFDL-ESM2M                                 | 1.4516 | 26           | MPI-ESM-LR                                  | 1.3821 |
| 6_RCA        | CCCma-<br>CanESM2(RCA4)                    | 1.4468 | 6_RCA        | CCCma-<br>CanESM2(RCA4)                     | 1.3521 |
| 9_RCA        | CNRM-CERFACS-<br>CNRM-<br>CM5(RCA4)        | 1.4150 | 27           | MPI-ESM-MR                                  | 1.3333 |
| 7            | CMCC-CM                                    | 1.4115 | 23           | MIROC5                                      | 1.3291 |
| 9            | CNRM-CM5                                   | 1.4094 | 22           | MIROC4h                                     | 1.3260 |
| 19           | IPSL-CM5A-LR                               | 1.3550 | 15           | HadGEM2-AO                                  | 1.3041 |
| 14_Reg<br>CM | NOAA-GFDL-<br>GFDL-<br>ESM2M(RegCM4-<br>4) | 1.3287 | 17           | HadGEM2-ES                                  | 1.2638 |
| 6            | CanESM2                                    | 1.3219 | 8            | CMCC-CMS                                    | 1.2545 |
| 8            | CMCC-CMS                                   | 1.2753 | 16           | HadGEM2-CC                                  | 1.2457 |
| 20           | IPSL-CM5A-MR                               | 1.2670 | 1            | ACCESS1.0                                   | 1.1775 |
| 14_RCA       | NOAA-GFDL-<br>GFDL-<br>ESM2M(RCA4)         | 1.2400 | 6            | CanESM2                                     | 1.1491 |
| 1            | ACCESS1.0                                  | 1.2255 | 20           | IPSL-CM5A-MR                                | 1.1442 |
| 11           | FGOALS-s2                                  | 1.2241 | 9_RegC<br>M  | CNRM-CER-<br>FACS-CNRM-<br>CM5(RegCM4-4)    | 1.0877 |
| 17_RCA       | MOHC-HadGEM2-<br>ES(RCA4)                  | 1.2120 | 10_RegC<br>M | CSIRO-QCCCE-<br>CSIRO-Mk3-6-<br>0(RegCM4-4) | 1.0640 |
| 15           | HadGEM2-AO                                 | 1.1999 | 3            | BCC                                         | 1.0416 |
| 28           | MRI-CGCM3                                  | 1.1896 | 13           | GFDL-ESM2G                                  | 1.0031 |
| 17           | HadGEM2-ES                                 | 1.1075 | 14           | GFDL-ESM2M                                  | 0.9839 |
| 16           | HadGEM2-CC                                 | 1.0273 | 12           | GFDL-CM3                                    | 0.9719 |
| 26_RCA       | MPI-M-MPI-ESM-<br>LR(RCA4)                 | 0.9814 | 6_RegC<br>M  | CCCma-<br>CanESM2(RegCM<br>4-4)             | 0.8786 |
| 18           | INM-CM4                                    | 0.9810 | 27_RegC<br>M | MPI-M-MPI-ESM-<br>MR(RegCM4-4)              | 0.8375 |
| 9_RegC<br>M  | CNRM-CERFACS-<br>CNRM-<br>CM5(RegCM4-4)    | 0.8692 | 14_RegC<br>M | NOAA-GFDL-<br>GFDL-<br>ESM2M(RegCM4-<br>4)  | 0.7925 |
| 22           | MIROC4h                                    | 0.8406 | 5            | CanCM4                                      | 0.7914 |
| 5            | CanCM4                                     | 0.7672 | 19           | IPSL-CM5A-LR                                | 0.7075 |
| 19_Reg<br>CM | IPSL-IPSL-CM5A-<br>LR(RegCM4-4)            | 0.6885 | 21           | IPSL-CM5B-LR                                | 0.6348 |
| 25           | MIROC-ESM-<br>CHEM                         | 0.5994 | 10           | CSIRO-Mk3.6.0                               | 0.6022 |

Continued...

...Table S3 continued

|              |                                |        |              |                                 |        |
|--------------|--------------------------------|--------|--------------|---------------------------------|--------|
| 2            | ACCESS1.3                      | 0.5759 | 2            | ACCESS1.3                       | 0.5687 |
| 24           | MIROC-ESM                      | 0.5357 | 28           | MRI-CGCM3                       | 0.5684 |
| 6_RegC<br>M  | CCCma-<br>CanESM2(RegCM4-4)    | 0.4534 | 11           | FGOALS-s2                       | 0.5066 |
| 23_RCA       | MIROC-MI-<br>ROC5(RCA4)        | 0.2713 | 19_RegC<br>M | IPSL-IPSL-CM5A-<br>LR(RegCM4-4) | 0.5022 |
| 21           | IPSL-CM5B-LR                   | 0.2627 | 4            | BNU-ESM                         | 0.4409 |
| 31_RCA       | NCC-NorESM1-<br>M(RCA4)        | 0.2619 | 18           | INM-CM4                         | 0.4056 |
| 27_Reg<br>CM | MPI-M-MPI-ESM-<br>MR(RegCM4-4) | 0.1574 | 24           | MIROC-ESM                       | 0.0163 |
| 20_RCA       | IPSL-IPSL-CM5A-<br>MR(RCA4)    | 0.0000 | 25           | MIROC-ESM-<br>CHEM              | 0.0142 |

**Table S4.** The Relative Score (RS) of each climate model (in descending order) in reproducing the seasonal mean wind speed over the South Asian Ocean and Land (Note: Here RS is out of 6, which is the summation of RS of a climate model in pre-monsoon, monsoon and post-monsoon seasons for both study time slices)

| South Asian Ocean |                                     |        | South Asian Land |                                         |        |
|-------------------|-------------------------------------|--------|------------------|-----------------------------------------|--------|
| Model ID          | Model Acronym                       | RS     | Model ID         | Model Acronym                           | RS     |
| 26_REMO           | MPI-M-MPI-ESM-<br>LR(REMO2009)      | 5.4010 | 26_REMO          | MPI-M-MPI-ESM-<br>LR(REMO2009)          | 5.0275 |
| 27                | MPI-ESM-MR                          | 5.1247 | 1                | ACCESS1.0                               | 4.8711 |
| 23                | MIROC5                              | 4.9814 | 14_RCA           | NOAA-GFDL-<br>GFDL-ESM2M(RCA4)          | 4.3954 |
| 10_RCA            | CSIRO-QCCCE-<br>CSIRO-Mk3-6-0(RCA4) | 4.6964 | 9_RCA            | CNRM-CER-<br>FACS-CNRM-CM5(RCA4)        | 4.1852 |
| 22                | MIROC4h                             | 4.6950 | 31_RCA           | NCC-NorESM1-<br>M(RCA4)                 | 3.8425 |
| 9_RCA             | CNRM-CER-<br>FACS-CNRM-CM5(RCA4)    | 4.6491 | 26_RCA           | MPI-M-MPI-ESM-LR(RCA4)                  | 3.8233 |
| 13                | GFDL-ESM2G                          | 4.6011 | 10_RegC<br>M     | CSIRO-QCCCE-<br>CSIRO-Mk3-6-0(RegCM4-4) | 3.7045 |
| 11                | FGOALS-s2                           | 4.5132 | 20_RCA           | IPSL-IPSL-CM5A-<br>MR(RCA4)             | 3.6376 |
| 3                 | BCC                                 | 4.4556 | 23_RCA           | MIROC-MI-<br>ROC5(RCA4)                 | 3.6165 |

Continued...

| ...Table S4 continued |                                             |        |              |                                          |        |
|-----------------------|---------------------------------------------|--------|--------------|------------------------------------------|--------|
| 9                     | CNRM-CM5                                    | 4.3804 | 10_RCA       | CSIRO-QCCCE-<br>CSIRO-Mk3-6-<br>0(RCA4)  | 3.6006 |
| 20                    | IPSL-CM5A-MR                                | 4.3426 | 7            | CMCC-CM                                  | 3.4297 |
| 6_RCA                 | CCCma-<br>CanESM2(RCA4)                     | 4.3250 | 8            | CMCC-CMS                                 | 3.4270 |
| 6                     | CanESM2                                     | 4.2806 | 9            | CNRM-CM5                                 | 3.3693 |
| 26                    | MPI-ESM-LR                                  | 4.2571 | 6_RCA        | CCCma-<br>CanESM2(RCA4)                  | 3.3503 |
| 10                    | CSIRO-Mk3.6.0                               | 4.2506 | 27           | MPI-ESM-MR                               | 3.3276 |
| 8                     | CMCC-CMS                                    | 4.2261 | 9_RegC<br>M  | CNRM-CER-<br>FACS-CNRM-<br>CM5(RegCM4-4) | 3.1510 |
| 1                     | ACCESS1.0                                   | 4.0990 | 22           | MIROC4h                                  | 3.1306 |
| 19                    | IPSL-CM5A-LR                                | 4.0371 | 6_RegC<br>M  | CCCma-<br>CanESM2(RegC<br>M4-4)          | 3.0985 |
| 14                    | GFDL-ESM2M                                  | 3.9793 | 23           | MIROC5                                   | 2.9932 |
| 14_RCA                | NOAA-GFDL-<br>GFDL-<br>ESM2M(RCA4)          | 3.8914 | 21           | IPSL-CM5B-LR                             | 2.9374 |
| 6_RegCM               | CCCma-<br>CanESM2(RegC<br>M4-4)             | 3.8905 | 26           | MPI-ESM-LR                               | 2.9290 |
| 10_RegC<br>M          | CSIRO-QCCCE-<br>CSIRO-Mk3-6-<br>0(RegCM4-4) | 3.8532 | 6            | CanESM2                                  | 2.9097 |
| 7                     | CMCC-CM                                     | 3.7844 | 32           | MME_CORDEX                               | 2.8564 |
| 5                     | CanCM4                                      | 3.7362 | 20           | IPSL-CM5A-MR                             | 2.8197 |
| 4                     | BNU-ESM                                     | 3.5684 | 17_RCA       | MOHC-<br>HadGEM2-<br>ES(RCA4)            | 2.7505 |
| 26_RCA                | MPI-M-MPI-<br>ESM-LR(RCA4)                  | 3.4856 | 12           | GFDL-CM3                                 | 2.6916 |
| 32                    | MME_CORDEX                                  | 3.4498 | 19_RegC<br>M | IPSL-IPSL-<br>CM5A-<br>LR(RegCM4-4)      | 2.5254 |
| 15                    | HadGEM2-AO                                  | 3.4336 | 5            | CanCM4                                   | 2.5048 |
| 29                    | MME_CMIP5                                   | 3.4081 | 27_RegC<br>M | MPI-M-MPI-<br>ESM-<br>MR(RegCM4-4)       | 2.5011 |
| 18                    | INM-CM4                                     | 3.3706 | 15           | HadGEM2-AO                               | 2.4823 |
| 12                    | GFDL-CM3                                    | 3.1035 | 16           | HadGEM2-CC                               | 2.4778 |
| 14_RegC<br>M          | NOAA-GFDL-<br>GFDL-<br>ESM2M(RegCM4<br>-4)  | 3.0517 | 3            | BCC                                      | 2.2773 |

Continued...



**...Table S4 continued**

|              |                                          |        |              |                                            |        |
|--------------|------------------------------------------|--------|--------------|--------------------------------------------|--------|
| 19_RegC<br>M | IPSL-IPSL-<br>CM5A-<br>LR(RegCM4-4)      | 2.9942 | 17           | HadGEM2-ES                                 | 2.2428 |
| 9_RegCM      | CNRM-CER-<br>FACS-CNRM-<br>CM5(RegCM4-4) | 2.8730 | 19           | IPSL-CM5A-LR                               | 2.1325 |
| 16           | HadGEM2-CC                               | 2.8625 | 14           | GFDL-ESM2M                                 | 2.0944 |
| 17           | HadGEM2-ES                               | 2.8082 | 13           | GFDL-ESM2G                                 | 2.0523 |
| 17_RCA       | MOHC-<br>HadGEM2-<br>ES(RCA4)            | 2.6034 | 14_RegC<br>M | NOAA-GFDL-<br>GFDL-<br>ESM2M(RegCM4<br>-4) | 1.9739 |
| 21           | IPSL-CM5B-LR                             | 2.4070 | 2            | ACCESS1.3                                  | 1.8545 |
| 23_RCA       | MIROC-MI-<br>ROC5(RCA4)                  | 2.3801 | 28           | MRI-CGCM3                                  | 1.7458 |
| 31_RCA       | NCC-NorESM1-<br>M(RCA4)                  | 2.3135 | 29           | MME_CMIP5                                  | 1.6798 |
| 2            | ACCESS1.3                                | 2.1883 | 4            | BNU-ESM                                    | 1.6176 |
| 27_RegC<br>M | MPI-M-MPI-<br>ESM-<br>MR(RegCM4-4)       | 2.0572 | 10           | CSIRO-Mk3.6.0                              | 1.5171 |
| 24           | MIROC-ESM                                | 1.9160 | 11           | FGOALS-s2                                  | 1.3876 |
| 25           | MIROC-ESM-<br>CHEM                       | 1.7528 | 18           | INM-CM4                                    | 1.3640 |
| 28           | MRI-CGCM3                                | 1.6570 | 24           | MIROC-ESM                                  | 0.7100 |
| 20_RCA       | IPSL-IPSL-<br>CM5A-<br>MR(RCA4)          | 1.4209 | 25           | MIROC-ESM-<br>CHEM                         | 0.6496 |

**Table S5.** The Relative Score (RS) of each climate model (in descending order) in reproducing the pre-monsoon mean wind speed trend over the South Asian Ocean and Land (Note: Here RS is out of 2, which is the summation of the historical time slice RS and present time slice RS)

| South Asian Ocean |               |        | South Asian Land |                                            |        |
|-------------------|---------------|--------|------------------|--------------------------------------------|--------|
| Model ID          | Model Acronym | RS     | Model ID         | Model Acronym                              | RS     |
| 12                | GFDL-CM3      | 1.7426 | 29               | MME_CMIP5                                  | 1.8277 |
| 9                 | CNRM-CM5      | 1.6763 | 32               | MME_CORDEX                                 | 1.7381 |
| 1                 | ACCESS1.0     | 1.5314 | 14_RegC<br>M     | NOAA-GFDL-<br>GFDL-<br>ESM2M(RegCM<br>4-4) | 1.5862 |
| 29                | MME_CMIP5     | 1.5288 | 2                | ACCESS1.3                                  | 1.4444 |
| 5                 | CanCM4        | 1.5079 | 14_RCA           | NOAA-GFDL-<br>GFDL-<br>ESM2M(RCA4)         | 1.4357 |
| 8                 | CMCC-CMS      | 1.5063 | 14               | GFDL-ESM2M                                 | 1.4199 |

Continued...

...Table S5 continued

|              |                                             |        |             |                                         |        |
|--------------|---------------------------------------------|--------|-------------|-----------------------------------------|--------|
| 10_RegC<br>M | CSIRO-QCCCE-<br>CSIRO-Mk3-6-<br>0(RegCM4-4) | 1.5060 | 27          | MPI-ESM-MR                              | 1.4083 |
| 20_RCA       | IPSL-IPSL-<br>CM5A-<br>MR(RCA4)             | 1.5036 | 3           | BCC                                     | 1.4009 |
| 4            | BNU-ESM                                     | 1.4933 | 7           | CMCC-CM                                 | 1.3784 |
| 14           | GFDL-ESM2M                                  | 1.4783 | 4           | BNU-ESM                                 | 1.3748 |
| 6_RegCM      | CCCma-<br>CanESM2(RegC<br>M4-4)             | 1.4503 | 13          | GFDL-ESM2G                              | 1.3662 |
| 10           | CSIRO-Mk3.6.0                               | 1.3807 | 26_REM<br>O | MPI-M-MPI-<br>ESM-<br>LR(REMO2009)      | 1.3086 |
| 13           | GFDL-ESM2G                                  | 1.3774 | 9           | CNRM-CM5                                | 1.3083 |
| 3            | BCC                                         | 1.3664 | 15          | HadGEM2-AO                              | 1.2727 |
| 9_RCA        | CNRM-CER-<br>FACS-CNRM-<br>CM5(RCA4)        | 1.3662 | 6           | CanESM2                                 | 1.2349 |
| 26           | MPI-ESM-LR                                  | 1.3091 | 28          | MRI-CGCM3                               | 1.2285 |
| 28           | MRI-CGCM3                                   | 1.3056 | 9_RCA       | CNRM-CER-<br>FACS-CNRM-<br>CM5(RCA4)    | 1.2107 |
| 32           | MME_CORDEX                                  | 1.3015 | 10_RCA      | CSIRO-QCCCE-<br>CSIRO-Mk3-6-<br>0(RCA4) | 1.2050 |
| 7            | CMCC-CM                                     | 1.2960 | 5           | CanCM4                                  | 1.2036 |
| 22           | MIROC4h                                     | 1.2769 | 6_RegC<br>M | CCCma-<br>CanESM2(RegC<br>M4-4)         | 1.1979 |
| 27           | MPI-ESM-MR                                  | 1.2762 | 18          | INM-CM4                                 | 1.1820 |
| 15           | HadGEM2-AO                                  | 1.2514 | 17          | HadGEM2-ES                              | 1.1718 |
| 9_RegCM      | CNRM-CER-<br>FACS-CNRM-<br>CM5(RegCM4-4)    | 1.2503 | 20_RCA      | IPSL-IPSL-<br>CM5A-<br>MR(RCA4)         | 1.1567 |
| 20           | IPSL-CM5A-MR                                | 1.2486 | 12          | GFDL-CM3                                | 1.1560 |
| 10_RCA       | CSIRO-QCCCE-<br>CSIRO-Mk3-6-<br>0(RCA4)     | 1.2364 | 21          | IPSL-CM5B-LR                            | 1.1472 |
| 21           | IPSL-CM5B-LR                                | 1.2097 | 17_RCA      | MOHC-<br>HadGEM2-<br>ES(RCA4)           | 1.1410 |
| 6_RCA        | CCCma-<br>CanESM2(RCA4)                     | 1.1939 | 10          | CSIRO-Mk3.6.0                           | 1.1315 |
| 14_RegC<br>M | NOAA-GFDL-<br>GFDL-<br>ESM2M(RegCM4<br>-4)  | 1.1875 | 31_RCA      | NCC-NorESM1-<br>M(RCA4)                 | 1.1064 |

Continued...

...Table S5 continued

|              |                                     |        |              |                                             |        |
|--------------|-------------------------------------|--------|--------------|---------------------------------------------|--------|
| 14_RCA       | NOAA-GFDL-<br>GFDL-<br>ESM2M(RCA4)  | 1.1830 | 26_RCA       | MPI-M-MPI-<br>ESM-LR(RCA4)                  | 1.1052 |
| 18           | INM-CM4                             | 1.1576 | 8            | CMCC-CMS                                    | 1.0981 |
| 2            | ACCESS1.3                           | 1.0992 | 10_RegC<br>M | CSIRO-QCCCE-<br>CSIRO-Mk3-6-<br>0(RegCM4-4) | 1.0728 |
| 17           | HadGEM2-ES                          | 1.0656 | 27_RegC<br>M | MPI-M-MPI-<br>ESM-<br>MR(RegCM4-4)          | 1.0291 |
| 16           | HadGEM2-CC                          | 1.0292 | 19_RegC<br>M | IPSL-IPSL-<br>CM5A-<br>LR(RegCM4-4)         | 1.0036 |
| 31_RCA       | NCC-NorESM1-<br>M(RCA4)             | 1.0289 | 6_RCA        | CCCma-<br>CanESM2(RCA4)                     | 0.9950 |
| 19_RegC<br>M | IPSL-IPSL-<br>CM5A-<br>LR(RegCM4-4) | 1.0253 | 22           | MIROC4h                                     | 0.9933 |
| 26_RCA       | MPI-M-MPI-<br>ESM-LR(RCA4)          | 1.0139 | 9_RegC<br>M  | CNRM-CER-<br>FACS-CNRM-<br>CM5(RegCM4-4)    | 0.9687 |
| 6            | CanESM2                             | 0.9663 | 20           | IPSL-CM5A-MR                                | 0.9483 |
| 23           | MIROC5                              | 0.9498 | 1            | ACCESS1.0                                   | 0.9032 |
| 27_RegC<br>M | MPI-M-MPI-<br>ESM-<br>MR(RegCM4-4)  | 0.9387 | 26           | MPI-ESM-LR                                  | 0.8637 |
| 27_RegC<br>M | MPI-M-MPI-<br>ESM-<br>MR(RegCM4-4)  | 0.9387 | 26           | MPI-ESM-LR                                  | 0.8637 |
| 26_REMO      | MPI-M-MPI-<br>ESM-<br>LR(REMO2009)  | 0.8048 | 19           | IPSL-CM5A-LR                                | 0.7435 |
| 25           | MIROC-ESM-<br>CHEM                  | 0.7958 | 16           | HadGEM2-CC                                  | 0.7433 |
| 17_RCA       | MOHC-<br>HadGEM2-<br>ES(RCA4)       | 0.7728 | 23_RCA       | MIROC-MI-<br>ROC5(RCA4)                     | 0.6866 |
| 24           | MIROC-ESM                           | 0.7518 | 11           | FGOALS-s2                                   | 0.6025 |
| 19           | IPSL-CM5A-LR                        | 0.7500 | 23           | MIROC5                                      | 0.4536 |
| 23_RCA       | MIROC-MI-<br>ROC5(RCA4)             | 0.6928 | 24           | MIROC-ESM                                   | 0.3169 |
| 11           | FGOALS-s2                           | 0.6839 | 25           | MIROC-ESM-<br>CHEM                          | 0.1800 |

**Table S6.** The Relative Score (RS) of each climate model (in descending order) in reproducing the monsoon mean wind speed trend over the South Asian Ocean and Land (Note: Here RS is out of 2, which is the summation of historical time slice RS and present time slice RS)

| South Asian Ocean |                                         |        | South Asian Land |                                        |        |
|-------------------|-----------------------------------------|--------|------------------|----------------------------------------|--------|
| Model ID          | Model Acronym                           | RS     | Model ID         | Model Acronym                          | RS     |
| 14                | GFDL-ESM2M                              | 1.9361 | 29               | MME_CMIP5                              | 2.0000 |
| 29                | MME_CMIP5                               | 1.7733 | 32               | MME_CORDEX                             | 1.7871 |
| 19                | IPSL-CM5A-LR                            | 1.7589 | 19_RegC<br>M     | IPSL-IPSL-<br>CM5A-<br>LR(RegCM4-4)    | 1.6416 |
| 6_RCA             | CCCma-<br>CanESM2(RCA4)                 | 1.7107 | 26               | MPI-ESM-LR                             | 1.6213 |
| 12                | GFDL-CM3                                | 1.7099 | 27_RegC<br>M     | MPI-M-MPI-<br>ESM-<br>MR(RegCM4-4)     | 1.6206 |
| 27                | MPI-ESM-MR                              | 1.6960 | 6                | CanESM2                                | 1.5316 |
| 10                | CSIRO-Mk3.6.0                           | 1.6794 | 15               | HadGEM2-AO                             | 1.5255 |
| 13                | GFDL-ESM2G                              | 1.6717 | 26_REM<br>O      | MPI-M-MPI-<br>ESM-<br>LR(REMO2009)     | 1.5243 |
| 27_RegC<br>M      | MPI-M-MPI-<br>ESM-<br>MR(RegCM4-4)      | 1.6432 | 14_RegC<br>M     | NOAA-GFDL-<br>GFDL-<br>ESM2M(RegCM4-4) | 1.5094 |
| 15                | HadGEM2-AO                              | 1.6231 | 14               | GFDL-ESM2M                             | 1.4960 |
| 2                 | ACCESS1.3                               | 1.5760 | 26_RCA           | MPI-M-MPI-<br>ESM-LR(RCA4)             | 1.4598 |
| 7                 | CMCC-CM                                 | 1.5750 | 2                | ACCESS1.3                              | 1.4429 |
| 6                 | CanESM2                                 | 1.5605 | 27               | MPI-ESM-MR                             | 1.4344 |
| 32                | MME_CORDEX                              | 1.5473 | 12               | GFDL-CM3                               | 1.4145 |
| 9_RCA             | CNRM-CER-<br>FACS-CNRM-<br>CM5(RCA4)    | 1.5384 | 6_RegC<br>M      | CCCma-<br>CanESM2(RegC<br>M4-4)        | 1.4140 |
| 3                 | BCC                                     | 1.5283 | 1                | ACCESS1.0                              | 1.3976 |
| 17                | HadGEM2-ES                              | 1.4497 | 6_RCA            | CCCma-<br>CanESM2(RCA4)                | 1.3710 |
| 31_RCA            | NCC-NorESM1-<br>M(RCA4)                 | 1.4479 | 14_RCA           | NOAA-GFDL-<br>GFDL-<br>ESM2M(RCA4)     | 1.3202 |
| 10_RCA            | CSIRO-QCCCE-<br>CSIRO-Mk3-6-<br>0(RCA4) | 1.4310 | 20_RCA           | IPSL-IPSL-<br>CM5A-<br>MR(RCA4)        | 1.3136 |
| 1                 | ACCESS1.0                               | 1.4245 | 4                | BNU-ESM                                | 1.2824 |
| 21                | IPSL-CM5B-LR                            | 1.4142 | 9_RCA            | CNRM-CER-<br>FACS-CNRM-<br>CM5(RCA4)   | 1.2820 |
| 28                | MRI-CGCM3                               | 1.3934 | 13               | GFDL-ESM2G                             | 1.2578 |
| 9                 | CNRM-CM5                                | 1.3511 | 11               | FGOALS-s2                              | 1.2482 |

Continued...

...Table S6 continued

|          |                                     |        |          |                                     |        |
|----------|-------------------------------------|--------|----------|-------------------------------------|--------|
| 20_RCA   | IPSL-IPSL-CM5A-MR(RCA4)             | 1.3431 | 20       | IPSL-CM5A-MR                        | 1.2120 |
| 18       | INM-CM4                             | 1.3245 | 7        | CMCC-CM                             | 1.2003 |
| 8        | CMCC-CMS                            | 1.3078 | 19       | IPSL-CM5A-LR                        | 1.2001 |
| 26       | MPI-ESM-LR                          | 1.3017 | 9        | CNRM-CM5                            | 1.1745 |
| 6_RegCM  | CCCma-CanESM2(RegCM4-4)             | 1.2785 | 28       | MRI-CGCM3                           | 1.1718 |
| 14_RCA   | NOAA-GFDL-GFDL-ESM2M(RCA4)          | 1.2711 | 5        | CanCM4                              | 1.1046 |
| 20       | IPSL-CM5A-MR                        | 1.2551 | 17_RCA   | MOHC-HadGEM2-ES(RCA4)               | 1.0933 |
| 19_RegCM | IPSL-IPSL-CM5A-LR(RegCM4-4)         | 1.2372 | 23_RCA   | MIROC-MIROC5(RCA4)                  | 1.0800 |
| 10_RegCM | CSIRO-QCCCE-CSIRO-Mk3-6-0(RegCM4-4) | 1.2291 | 10       | CSIRO-Mk3.6.0                       | 1.0794 |
| 5        | CanCM4                              | 1.2273 | 17       | HadGEM2-ES                          | 1.0516 |
| 23_RCA   | MIROC-MIROC5(RCA4)                  | 1.1784 | 3        | BCC                                 | 1.0353 |
| 25       | MIROC-ESM-CHEM                      | 1.1608 | 8        | CMCC-CMS                            | 1.0243 |
| 14_RegCM | NOAA-GFDL-GFDL-ESM2M(RegCM4-4)      | 1.1174 | 18       | INM-CM4                             | 1.0239 |
| 11       | FGOALS-s2                           | 1.0306 | 9_RegCM  | CNRM-CER-FACS-CNRM-CM5(RegCM4-4)    | 1.0230 |
| 9_RegCM  | CNRM-CER-FACS-CNRM-CM5(RegCM4-4)    | 1.0304 | 10_RCA   | CSIRO-QCCCE-CSIRO-Mk3-6-0(RCA4)     | 1.0048 |
| 4        | BNU-ESM                             | 1.0258 | 31_RCA   | NCC-NorESM1-M(RCA4)                 | 0.9265 |
| 23       | MIROC5                              | 1.0175 | 21       | IPSL-CM5B-LR                        | 0.9006 |
| 16       | HadGEM2-CC                          | 0.9701 | 22       | MIROC4h                             | 0.8976 |
| 17_RCA   | MOHC-HadGEM2-ES(RCA4)               | 0.9699 | 25       | MIROC-ESM-CHEM                      | 0.7224 |
| 26_RCA   | MPI-M-MPI-ESM-LR(RCA4)              | 0.8828 | 10_RegCM | CSIRO-QCCCE-CSIRO-Mk3-6-0(RegCM4-4) | 0.7221 |

Continued...

...Table S6 continued

|         |                            |        |    |            |        |
|---------|----------------------------|--------|----|------------|--------|
| 22      | MIROC4h                    | 0.8330 | 23 | MIROC5     | 0.7151 |
| 26_REMO | MPI-M-MPI-ESM-LR(REMO2009) | 0.6750 | 16 | HadGEM2-CC | 0.5126 |
| 24      | MIROC-ESM                  | 0.2391 | 24 | MIROC-ESM  | 0.2466 |

**Table S7.** The Relative Score (RS) of each climate model (in descending order) in reproducing the post-monsoon mean wind speed trend over the South Asian Ocean and Land (Note: Here RS is out of 2, which is the summation of the historical time slice RS and present time slice RS)

| South Asian Ocean |                                 |        | South Asian Land |                                 |        |
|-------------------|---------------------------------|--------|------------------|---------------------------------|--------|
| Model ID          | Model Acronym                   | RS     | Model ID         | Model Acronym                   | RS     |
| 26                | MPI-ESM-LR                      | 1.7734 | 29               | MME_CMIP5                       | 1.8432 |
| 29                | MME_CMIP5                       | 1.7174 | 32               | MME_CORDEX                      | 1.5694 |
| 13                | GFDL-ESM2G                      | 1.5775 | 9_Reg CM         | CNRM-CERFACS-CNRM-CM5(RegCM4-4) | 1.5285 |
| 4                 | BNU-ESM                         | 1.5669 | 26_R CA          | MPI-M-MPI-ESM-LR(RCA4)          | 1.4971 |
| 26_R CA           | MPI-M-MPI-ESM-LR(RCA4)          | 1.5635 | 4                | BNU-ESM                         | 1.4659 |
| 27                | MPI-ESM-MR                      | 1.4954 | 8                | CMCC-CMS                        | 1.4604 |
| 20                | IPSL-CM5A-MR                    | 1.4525 | 2                | ACCESS1.3                       | 1.4246 |
| 7                 | CMCC-CM                         | 1.4331 | 14_Reg CM        | NOAA-GFDL-GFDL-ESM2M(RegCM4-4)  | 1.4112 |
| 15                | HadGEM2-AO                      | 1.4241 | 27_Reg CM        | MPI-M-MPI-ESM-MR(RegCM4-4)      | 1.3966 |
| 28                | MRI-CGCM3                       | 1.4186 | 27               | MPI-ESM-MR                      | 1.3719 |
| 32                | MME_CORDEX                      | 1.4049 | 14_R CA          | NOAA-GFDL-GFDL-ESM2M(RCA4)      | 1.3583 |
| 20_R CA           | IPSL-IPSL-CM5A-MR(RCA4)         | 1.3637 | 14               | GFDL-ESM2M                      | 1.3577 |
| 10_R CA           | CSIRO-QCCCE-CSIRO-Mk3-6-0(RCA4) | 1.3567 | 15               | HadGEM2-AO                      | 1.3488 |
| 3                 | BCC                             | 1.3531 | 13               | GFDL-ESM2G                      | 1.3388 |
| 26_R EMO          | MPI-M-MPI-ESM-LR(REMO2009)      | 1.3238 | 9                | CNRM-CM5                        | 1.3179 |
| 10                | CSIRO-Mk3.6.0                   | 1.3221 | 28               | MRI-CGCM3                       | 1.2899 |
| 2                 | ACCESS1.3                       | 1.2960 | 9_RC A           | CNRM-CERFACS-CNRM-CM5(RCA4)     | 1.2792 |
| 14_R CA           | NOAA-GFDL-GFDL-ESM2M(RCA4)      | 1.2500 | 3                | BCC                             | 1.2734 |

Continued...

...Table S7 continued

|              |                                             |        |              |                                             |        |
|--------------|---------------------------------------------|--------|--------------|---------------------------------------------|--------|
| 16           | HadGEM2-CC                                  | 1.2443 | 26_R<br>EMO  | MPI-M-MPI-ESM-<br>LR(REMO2009)              | 1.2615 |
| 9_RC<br>A    | CNRM-CERFACS-<br>CNRM-CM5(RCA4)             | 1.2347 | 10_R<br>CA   | CSIRO-QCCCE-<br>CSIRO-Mk3-6-<br>0(RCA4)     | 1.2378 |
| 21           | IPSL-CM5B-LR                                | 1.2204 | 19_Re<br>gCM | IPSL-IPSL-CM5A-<br>LR(RegCM4-4)             | 1.2186 |
| 1            | ACCESS1.0                                   | 1.2084 | 20_R<br>CA   | IPSL-IPSL-CM5A-<br>MR(RCA4)                 | 1.2049 |
| 14_Re<br>gCM | NOAA-GFDL-<br>GFDL-<br>ESM2M(RegCM4-4)      | 1.1743 | 23_R<br>CA   | MIROC-MI-<br>ROC5(RCA4)                     | 1.1999 |
| 8            | CMCC-CMS                                    | 1.1678 | 26           | MPI-ESM-LR                                  | 1.1495 |
| 9_Reg<br>CM  | CNRM-CERFACS-<br>CNRM-<br>CM5(RegCM4-4)     | 1.1234 | 17           | HadGEM2-ES                                  | 1.1466 |
| 22           | MIROC4h                                     | 1.0649 | 20           | IPSL-CM5A-MR                                | 1.1085 |
| 9            | CNRM-CM5                                    | 1.0386 | 10           | CSIRO-Mk3.6.0                               | 1.1084 |
| 23_R<br>CA   | MIROC-MI-<br>ROC5(RCA4)                     | 1.0311 | 23           | MIROC5                                      | 1.0887 |
| 24           | MIROC-ESM                                   | 1.0155 | 7            | CMCC-CM                                     | 0.9861 |
| 6_RC<br>A    | CCCma-<br>CanESM2(RCA4)                     | 0.9859 | 10_Re<br>gCM | CSIRO-QCCCE-<br>CSIRO-Mk3-6-<br>0(RegCM4-4) | 0.9638 |
| 12           | GFDL-CM3                                    | 0.9817 | 21           | IPSL-CM5B-LR                                | 0.9574 |
| 19_Re<br>gCM | IPSL-IPSL-CM5A-<br>LR(RegCM4-4)             | 0.9208 | 6_Reg<br>CM  | CCCma-<br>CanESM2(RegCM4-<br>4)             | 0.9420 |
| 25           | MIROC-ESM-CHEM                              | 0.9095 | 1            | ACCESS1.0                                   | 0.9263 |
| 11           | FGOALS-s2                                   | 0.8818 | 6            | CanESM2                                     | 0.8730 |
| 6            | CanESM2                                     | 0.8659 | 17_R<br>CA   | MOHC-HadGEM2-<br>ES(RCA4)                   | 0.8537 |
| 18           | INM-CM4                                     | 0.8192 | 19           | IPSL-CM5A-LR                                | 0.8103 |
| 17           | HadGEM2-ES                                  | 0.8169 | 22           | MIROC4h                                     | 0.8089 |
| 23           | MIROC5                                      | 0.7829 | 6_RC<br>A    | CCCma-<br>CanESM2(RCA4)                     | 0.7978 |
| 14           | GFDL-ESM2M                                  | 0.7392 | 11           | FGOALS-s2                                   | 0.7664 |
| 19           | IPSL-CM5A-LR                                | 0.7239 | 12           | GFDL-CM3                                    | 0.6662 |
| 5            | CanCM4                                      | 0.6536 | 16           | HadGEM2-CC                                  | 0.6434 |
| 17_R<br>CA   | MOHC-HadGEM2-<br>ES(RCA4)                   | 0.6436 | 18           | INM-CM4                                     | 0.6367 |
| 31_R<br>CA   | NCC-NorESM1-<br>M(RCA4)                     | 0.6219 | 31_R<br>CA   | NCC-NorESM1-<br>M(RCA4)                     | 0.6278 |
| 6_Reg<br>CM  | CCCma-<br>CanESM2(RegCM4-4)                 | 0.5954 | 5            | CanCM4                                      | 0.5403 |
| 10_Re<br>gCM | CSIRO-QCCCE-<br>CSIRO-Mk3-6-<br>0(RegCM4-4) | 0.5671 | 25           | MIROC-ESM-CHEM                              | 0.5345 |

|              |                                |        |    |           |        |
|--------------|--------------------------------|--------|----|-----------|--------|
| 27_Re<br>gCM | MPI-M-MPI-ESM-<br>MR(RegCM4-4) | 0.4760 | 24 | MIROC-ESM | 0.0131 |
|--------------|--------------------------------|--------|----|-----------|--------|

**Table S8.** The Relative Score (RS) of each climate model (in descending order) in reproducing the seasonal mean wind speed trend over the South Asian Ocean and Land (Note: Here RS is out of 6, which is the summation of RS of a climate model in pre-monsoon, monsoon and post-monsoon seasons for both study time slices)

| South Asian Ocean |                                         |        | South Asian Land |                                            |        |
|-------------------|-----------------------------------------|--------|------------------|--------------------------------------------|--------|
| Model ID          | Model Acronym                           | RS     | Model ID         | Model Acronym                              | RS     |
| 29                | MME_CMIP5                               | 5.0195 | 29               | MME_CMIP5                                  | 5.6709 |
| 13                | GFDL-ESM2G                              | 4.6266 | 32               | MME_CORDEX                                 | 5.0947 |
| 27                | MPI-ESM-MR                              | 4.4676 | 14_RegC<br>M     | NOAA-GFDL-<br>GFDL-<br>ESM2M(RegCM4-<br>4) | 4.5068 |
| 12                | GFDL-CM3                                | 4.4343 | 2                | ACCESS1.3                                  | 4.3119 |
| 26                | MPI-ESM-LR                              | 4.3842 | 14               | GFDL-ESM2M                                 | 4.2736 |
| 10                | CSIRO-Mk3.6.0                           | 4.3822 | 27               | MPI-ESM-MR                                 | 4.2146 |
| 7                 | CMCC-CM                                 | 4.3041 | 15               | HadGEM2-AO                                 | 4.1470 |
| 15                | HadGEM2-AO                              | 4.2986 | 4                | BNU-ESM                                    | 4.1231 |
| 32                | MME_CORDEX                              | 4.2537 | 14_RCA           | NOAA-GFDL-<br>GFDL-<br>ESM2M(RCA4)         | 4.1142 |
| 3                 | BCC                                     | 4.2478 | 26_REM<br>O      | MPI-M-MPI-ESM-<br>LR(REMO2009)             | 4.0944 |
| 20_RCA            | IPSL-IPSL-CM5A-<br>MR(RCA4)             | 4.2104 | 26_RCA           | MPI-M-MPI-ESM-<br>LR(RCA4)                 | 4.0622 |
| 1                 | ACCESS1.0                               | 4.1643 | 27_RegC<br>M     | MPI-M-MPI-ESM-<br>MR(RegCM4-4)             | 4.0463 |
| 14                | GFDL-ESM2M                              | 4.1536 | 13               | GFDL-ESM2G                                 | 3.9629 |
| 9_RCA             | CNRM-CER-<br>FACS-CNRM-<br>CM5(RCA4)    | 4.1393 | 19_RegC<br>M     | IPSL-IPSL-CM5A-<br>LR(RegCM4-4)            | 3.8638 |
| 28                | MRI-CGCM3                               | 4.1176 | 9                | CNRM-CM5                                   | 3.8006 |
| 4                 | BNU-ESM                                 | 4.0860 | 9_RCA            | CNRM-CERFACS-<br>CNRM-<br>CM5(RCA4)        | 3.7719 |
| 9                 | CNRM-CM5                                | 4.0660 | 3                | BCC                                        | 3.7097 |
| 10_RCA            | CSIRO-QCCCE-<br>CSIRO-Mk3-6-<br>0(RCA4) | 4.0241 | 28               | MRI-CGCM3                                  | 3.6903 |
| 8                 | CMCC-CMS                                | 3.9819 | 20_RCA           | IPSL-IPSL-CM5A-<br>MR(RCA4)                | 3.6752 |
| 2                 | ACCESS1.3                               | 3.9712 | 6                | CanESM2                                    | 3.6395 |
| 20                | IPSL-CM5A-MR                            | 3.9561 | 26               | MPI-ESM-LR                                 | 3.6345 |

Continued...



...Table S8 continued

|              |                                             |        |              |                                             |        |
|--------------|---------------------------------------------|--------|--------------|---------------------------------------------|--------|
| 6_RCA        | CCCma-<br>CanESM2(RCA4)                     | 3.8906 | 8            | CMCC-CMS                                    | 3.5828 |
| 21           | IPSL-CM5B-LR                                | 3.8443 | 7            | CMCC-CM                                     | 3.5648 |
| 14_RCA       | NOAA-GFDL-<br>GFDL-<br>ESM2M(RCA4)          | 3.7041 | 6_RegC<br>M  | CCCma-<br>CanESM2(RegCM<br>4-4)             | 3.5539 |
| 14_RegC<br>M | NOAA-GFDL-<br>GFDL-<br>ESM2M(RegCM4-<br>4)  | 3.4793 | 9_RegC<br>M  | CNRM-CERFACS-<br>CNRM-<br>CM5(RegCM4-4)     | 3.5201 |
| 26_RCA       | MPI-M-MPI-ESM-<br>LR(RCA4)                  | 3.4603 | 10_RCA       | CSIRO-QCCCE-<br>CSIRO-Mk3-6-<br>0(RCA4)     | 3.4476 |
| 9_RegCM      | CNRM-CER-<br>FACS-CNRM-<br>CM5(RegCM4-4)    | 3.4040 | 17           | HadGEM2-ES                                  | 3.3700 |
| 6            | CanESM2                                     | 3.3927 | 10           | CSIRO-Mk3.6.0                               | 3.3194 |
| 5            | CanCM4                                      | 3.3888 | 20           | IPSL-CM5A-MR                                | 3.2688 |
| 17           | HadGEM2-ES                                  | 3.3322 | 12           | GFDL-CM3                                    | 3.2367 |
| 6_RegCM      | CCCma-<br>CanESM2(RegCM<br>4-4)             | 3.3243 | 1            | ACCESS1.0                                   | 3.2271 |
| 10_RegC<br>M | CSIRO-QCCCE-<br>CSIRO-Mk3-6-<br>0(RegCM4-4) | 3.3022 | 6_RCA        | CCCma-<br>CanESM2(RCA4)                     | 3.1638 |
| 18           | INM-CM4                                     | 3.3013 | 17_RCA       | MOHC-<br>HadGEM2-<br>ES(RCA4)               | 3.0881 |
| 16           | HadGEM2-CC                                  | 3.2437 | 21           | IPSL-CM5B-LR                                | 3.0051 |
| 19           | IPSL-CM5A-LR                                | 3.2328 | 23_RCA       | MIROC-MI-<br>ROC5(RCA4)                     | 2.9666 |
| 19_RegC<br>M | IPSL-IPSL-CM5A-<br>LR(RegCM4-4)             | 3.1832 | 5            | CanCM4                                      | 2.8486 |
| 22           | MIROC4h                                     | 3.1747 | 18           | INM-CM4                                     | 2.8426 |
| 31_RCA       | NCC-NorESM1-<br>M(RCA4)                     | 3.0987 | 10_RegC<br>M | CSIRO-QCCCE-<br>CSIRO-Mk3-6-<br>0(RegCM4-4) | 2.7588 |
| 27_RegC<br>M | MPI-M-MPI-ESM-<br>MR(RegCM4-4)              | 3.0579 | 19           | IPSL-CM5A-LR                                | 2.7540 |
| 23_RCA       | MIROC-MI-<br>ROC5(RCA4)                     | 2.9023 | 22           | MIROC4h                                     | 2.6998 |
| 25           | MIROC-ESM-<br>CHEM                          | 2.8661 | 31_RCA       | NCC-NorESM1-<br>M(RCA4)                     | 2.6608 |
| 26_REMO      | MPI-M-MPI-ESM-<br>LR(REMO2009)              | 2.8036 | 11           | FGOALS-s2                                   | 2.6170 |
| 23           | MIROC5                                      | 2.7502 | 23           | MIROC5                                      | 2.2575 |
| 11           | FGOALS-s2                                   | 2.5963 | 16           | HadGEM2-CC                                  | 1.8993 |

Continued...

...Table S8 continued

|        |                       |        |    |                |        |
|--------|-----------------------|--------|----|----------------|--------|
| 17_RCA | MOHC-HadGEM2-ES(RCA4) | 2.3862 | 25 | MIROC-ESM-CHEM | 1.4370 |
| 24     | MIROC-ESM             | 2.0063 | 24 | MIROC-ESM      | 0.5765 |

**Table S9.** The Relative Score (RS) of each climate model (in descending order) in reproducing the annual mean wind speed trend over the South Asian Ocean and Land (Note: Here RS is out of 2, which is the summation of the historical time slice RS and present time slice RS)

| South Asian Ocean |                                     |        | South Asian Land |                                |        |
|-------------------|-------------------------------------|--------|------------------|--------------------------------|--------|
| Mode 1 ID         | Model Acronym                       | RS     | Mode 1 ID        | Model Acronym                  | RS     |
| 14                | GFDL-ESM2M                          | 1.8178 | 29               | MME_CMIP5                      | 1.7765 |
| 6_RC A            | CCCma-CanESM2(RCA4)                 | 1.6469 | 32               | MME_CORDEX                     | 1.7279 |
| 9                 | CNRM-CM5                            | 1.6409 | 14_Re gCM        | NOAA-GFDL-GFDL-ESM2M(RegCM4-4) | 1.6142 |
| 26                | MPI-ESM-LR                          | 1.6096 | 14               | GFDL-ESM2M                     | 1.5751 |
| 13                | GFDL-ESM2G                          | 1.5764 | 27               | MPI-ESM-MR                     | 1.5245 |
| 12                | GFDL-CM3                            | 1.5733 | 9_RC A           | CNRM-CERFACS-CNRM-CM5(RCA4)    | 1.5158 |
| 29                | MME_CMIP5                           | 1.5662 | 26_R CA          | MPI-M-MPI-ESM-LR(RCA4)         | 1.4791 |
| 27                | MPI-ESM-MR                          | 1.5581 | 27_Re gCM        | MPI-M-MPI-ESM-MR(RegCM4-4)     | 1.4789 |
| 10_R CA           | CSIRO-QCCCE-CSIRO-Mk3-6-0(RCA4)     | 1.5291 | 26_RE MO         | MPI-M-MPI-ESM-LR(REMO2009)     | 1.4768 |
| 28                | MRI-CGCM3                           | 1.5165 | 14_R CA          | NOAA-GFDL-GFDL-ESM2M(RCA4)     | 1.4717 |
| 20_R CA           | IPSL-IPSL-CM5A-MR(RCA4)             | 1.4605 | 9                | CNRM-CM5                       | 1.4630 |
| 3                 | BCC                                 | 1.4288 | 2                | ACCESS1.3                      | 1.4412 |
| 10                | CSIRO-Mk3.6.0                       | 1.4283 | 4                | BNU-ESM                        | 1.4280 |
| 1                 | ACCESS1.0                           | 1.4157 | 26               | MPI-ESM-LR                     | 1.3822 |
| 9_RC A            | CNRM-CERFACS-CNRM-CM5(RCA4)         | 1.3678 | 19_Re gCM        | IPSL-IPSL-CM5A-LR(RegCM4-4)    | 1.3646 |
| 2                 | ACCESS1.3                           | 1.3379 | 15               | HadGEM2-AO                     | 1.3484 |
| 8                 | CMCC-CMS                            | 1.3331 | 20_R CA          | IPSL-IPSL-CM5A-MR(RCA4)        | 1.3466 |
| 10_Re gCM         | CSIRO-QCCCE-CSIRO-Mk3-6-0(RegCM4-4) | 1.3331 | 6_Reg CM         | CCCma-CanESM2(RegCM4-4)        | 1.3098 |
| 32                | MME_CORDEX                          | 1.3298 | 13               | GFDL-ESM2G                     | 1.2858 |
| 6_Reg CM          | CCCma-CanESM2(RegCM4-4)             | 1.3275 | 6_RC A           | CCCma-CanESM2(RCA4)            | 1.2590 |

Continued...

...Table S9 continued

|              |                                         |        |              |                                             |        |
|--------------|-----------------------------------------|--------|--------------|---------------------------------------------|--------|
| 15           | HadGEM2-AO                              | 1.3265 | 28           | MRI-CGCM3                                   | 1.2584 |
| 14_R<br>CA   | NOAA-GFDL-GFDL-<br>ESM2M(RCA4)          | 1.3257 | 17_R<br>CA   | MOHC-HadGEM2-<br>ES(RCA4)                   | 1.2483 |
| 7            | CMCC-CM                                 | 1.3106 | 9_Reg<br>CM  | CNRM-CERFACS-<br>CNRM-<br>CM5(RegCM4-4)     | 1.2421 |
| 4            | BNU-ESM                                 | 1.2965 | 10_R<br>CA   | CSIRO-QCCCE-<br>CSIRO-Mk3-6-<br>0(RCA4)     | 1.2000 |
| 20           | IPSL-CM5A-MR                            | 1.2962 | 10           | CSIRO-Mk3.6.0                               | 1.1867 |
| 21           | IPSL-CM5B-LR                            | 1.2714 | 20           | IPSL-CM5A-MR                                | 1.1856 |
| 14_Re<br>gCM | NOAA-GFDL-GFDL-<br>ESM2M(RegCM4-4)      | 1.2381 | 17           | HadGEM2-ES                                  | 1.1784 |
| 26_RE<br>MO  | MPI-M-MPI-ESM-<br>LR(REMO2009)          | 1.2047 | 12           | GFDL-CM3                                    | 1.1757 |
| 6            | CanESM2                                 | 1.2046 | 1            | ACCESS1.0                                   | 1.1685 |
| 19_Re<br>gCM | IPSL-IPSL-CM5A-<br>LR(RegCM4-4)         | 1.2020 | 8            | CMCC-CMS                                    | 1.1581 |
| 5            | CanCM4                                  | 1.2019 | 6            | CanESM2                                     | 1.1579 |
| 9_Reg<br>CM  | CNRM-CERFACS-<br>CNRM-CM5(RegCM4-<br>4) | 1.1980 | 3            | BCC                                         | 1.1238 |
| 17           | HadGEM2-ES                              | 1.1969 | 7            | CMCC-CM                                     | 1.0998 |
| 31_R<br>CA   | NCC-NorESM1-<br>M(RCA4)                 | 1.1559 | 21           | IPSL-CM5B-LR                                | 1.0596 |
| 27_Re<br>gCM | MPI-M-MPI-ESM-<br>MR(RegCM4-4)          | 1.1343 | 23_R<br>CA   | MIROC-MI-<br>ROC5(RCA4)                     | 0.9274 |
| 18           | INM-CM4                                 | 1.1282 | 5            | CanCM4                                      | 0.9251 |
| 26_R<br>CA   | MPI-M-MPI-ESM-<br>LR(RCA4)              | 1.0835 | 11           | FGOALS-s2                                   | 0.9001 |
| 22           | MIROC4h                                 | 1.0299 | 19           | IPSL-CM5A-LR                                | 0.8987 |
| 24           | MIROC-ESM                               | 0.9470 | 22           | MIROC4h                                     | 0.8280 |
| 25           | MIROC-ESM-CHEM                          | 0.8974 | 23           | MIROC5                                      | 0.8257 |
| 19           | IPSL-CM5A-LR                            | 0.8681 | 10_Re<br>gCM | CSIRO-QCCCE-<br>CSIRO-Mk3-6-<br>0(RegCM4-4) | 0.8222 |
| 23           | MIROC5                                  | 0.8510 | 18           | INM-CM4                                     | 0.8120 |
| 16           | HadGEM2-CC                              | 0.8267 | 31_R<br>CA   | NCC-NorESM1-<br>M(RCA4)                     | 0.7448 |
| 23_R<br>CA   | MIROC-MI-<br>ROC5(RCA4)                 | 0.7617 | 16           | HadGEM2-CC                                  | 0.5989 |
| 17_R<br>CA   | MOHC-HadGEM2-<br>ES(RCA4)               | 0.6297 | 25           | MIROC-ESM-CHEM                              | 0.4147 |
| 11           | FGOALS-s2                               | 0.4144 | 24           | MIROC-ESM                                   | 0.0540 |

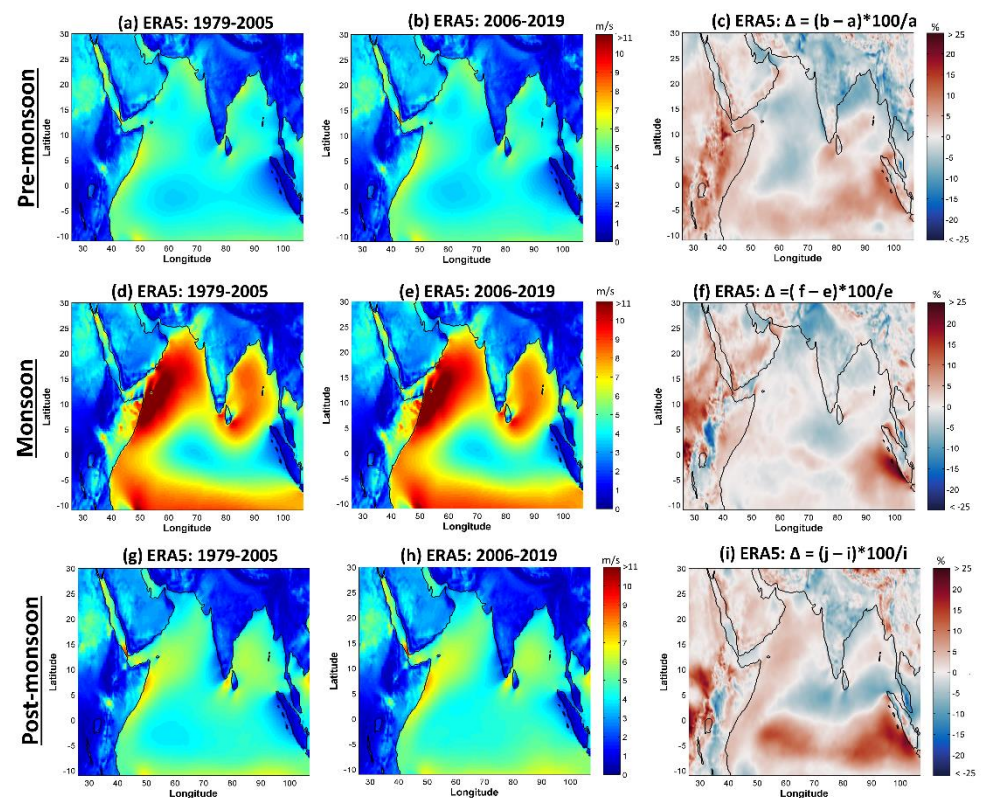

**Figure S1.** Pre-monsoon (February–May) mean wind speed spatial maps of ERA5 for the (a) historical (1979–2005) and (b) present time slice (2006–2019). (c) percentage change of present time slice pre-monsoon mean wind speed relative to historical time slice pre-monsoon mean wind speed ( $\Delta$ , %). (d–f) As in (a–c), but for the monsoon season (June–September). (g–i) As in (a–c), but for the post-monsoon season (October–January).

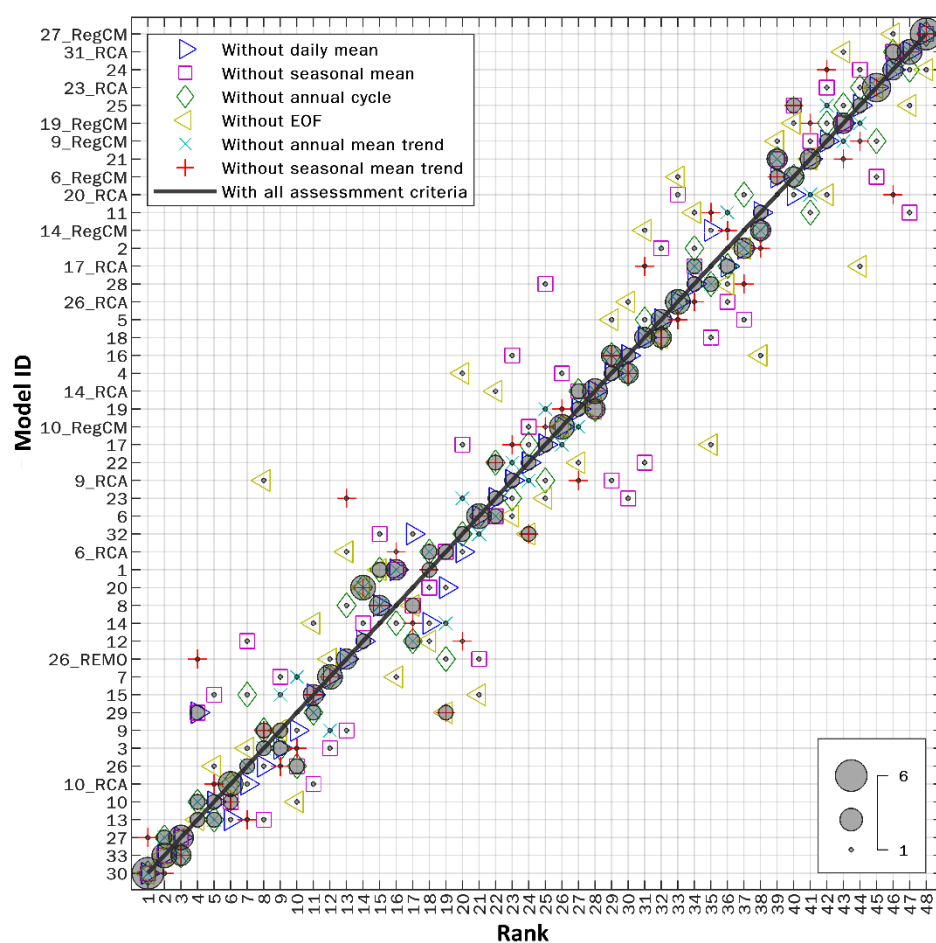

**Figure S2.** Sensitivity of climate model's rank with chosen assessment criteria over ocean part of South Asian domain. Climate model rank obtained by removing a specific assessment criterion are marked with, right pointed triangle markers for without evaluating daily mean wind speed, square markers for without evaluating the seasonal mean wind speed, diamond markers for without evaluating the long-term monthly mean wind speed pattern (annual cycle), left pointed triangle markers for without consideration of Empirical Orthogonal Function (EOF) analysis, cross sign markers for without evaluating annual mean wind speed trend and plus sign markers without for evaluating seasonal mean wind speed trend. The bubble size indicates, total how many cases (out of 7) have given a particular rank to the climate model. For example, Model 30 has secured the first rank in 6 cases (except, without the seasonal mean trend case). The thick black line is the result case obtained by considering all the assessment criteria and it passes through the largest bubble for 36 ranks out of 48. The interchange of rank is observed between the climate models whose total relative score is near to each other.

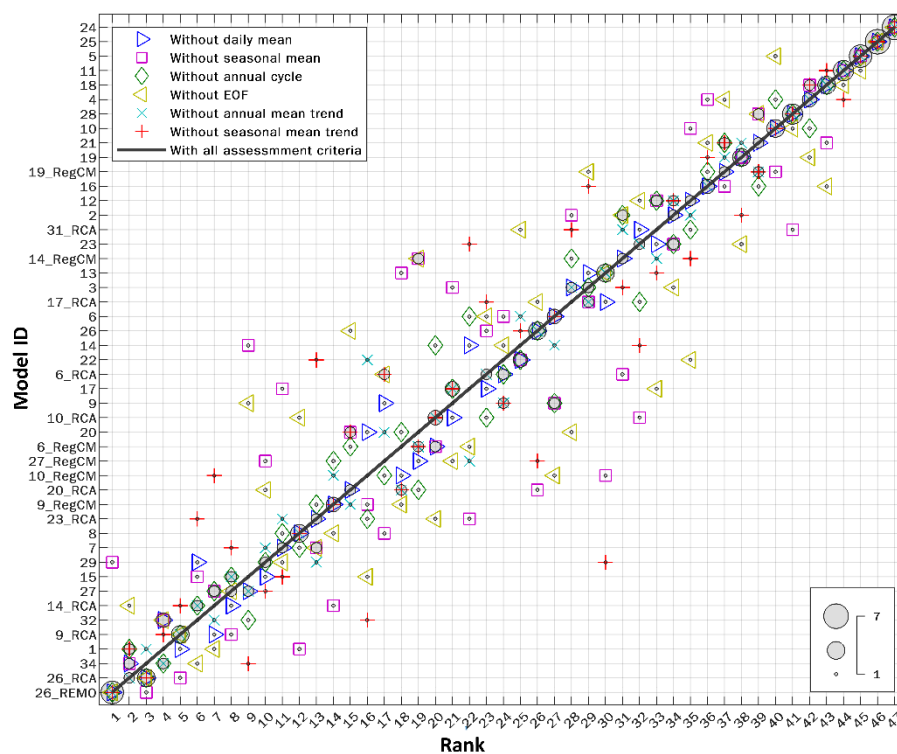

**Figure S3.** As in Figure S2, but for over the land part of South Asian Domain. For example, Model 26\_REMO has secured the first rank in 6 cases (except, without the seasonal mean case). Whereas, Models 24 and 25 have secured 47 and 46, respectively in all 7 cases.
